# Supplementary material
Source: publisher site journal article supplement (https://www.dovepress.com/article/supplementary_file/569431/569431%20Supplementary%20table.xlsx)
Supplement: Supplementary file 1 [file 569431%20Supplementary%20table.xlsx]

## Sheet: Sheet1
Table S1 JBI Checklist
Study	Inclusion Criteria	Description of Study Details	Validity and Reliability of Exposure Measurement	Condition Measurement	Identification of Confounding Factors	Mitigation of Confounding Factors	Vality and Reliability of Outcome Measurement	Propriety of Staistical Analysis
Al Bahhawi17	Male primary students	Multistage rural/urban	Non-cycloplegic autorefractor	Standard RE cut-offs	Residence, parental RE	Crude OR only	Limited by no cycloplegia	OR, CI
Al Mazrou16	Saudi parents of children	Online survey; Riyadh population; random sampling	Questionnaire; pilot tested; Cronbach’s α=0.784	Awareness domains defined	Education, gender, occupation	χ², t-tests, ANOVA only	Acceptable internal reliability; self-report	Descriptive + χ² + t-test + ANOVA
Al Musalami18	parents of 0–18 yrs	National sample	Adapted validated tool	Not applicable	Education, healthcare	χ² + non-parametric	Internally valid	Mann–Whitney + χ²
Alanazi19	Saudi parents of <18-yr children	National; online social media recruitment; Feb–Mar 2024	Pre-validated questionnaire; translated; pilot tested; no reliability coefficient reported	Knowledge, awareness, practice domains defined	Sex, age, education, job, income, child eye disease	Logistic regression	Acceptable; good instrument development; convenience online sample	Descriptive + χ² + exact tests + logistic regression
Alatawi14	Parents in Tabuk	Online survey; region defined	Modified + piloted tool	Not applicable	Demographics	None	Acceptable	Descriptive + χ²
Aldebasi2,20	6–13 with ocular disease excluded	21 schools selected by authority; large region	Full exam + cycloplegic refraction	Strict unilateral/bilateral amblyopia definitions	Age, sex	Prevalence only	Very high validity	SAS; p-values
Aldhabaan20	parents of 5–12 yr children	Aseer region; online community-based sample	Piloted, expert-reviewed questionnaire	Not applicable	Age, education, family blindness	Not controlled analytically	Questionnaire with good content validity	Descriptive + χ²
Alemam21	Clinic attendees 3–14 yrs	Ohud Hospital pediatric ophthalmology clinic; May–Sep 2017	Full exam; age-stratified cycloplegic refraction for younger children; subjective refraction for older	Defined SE thresholds for myopia; standardized VA and alignment criteria	Age, sex, activity variables	Not analytically controlled	High validity for RE (cycloplegia in <6 yrs; standardized tests)	Descriptiv
Alenezi4	Households	Sampling frame described	Maternal report only	No diagnostic criteria	Sex, consanguinity	Bivariate only	Very weak validity	Descriptive + χ²
Algethami5	SEN schools in western KSA	23 SEN schools; administrative staff respondents	Questionnaire; translated and piloted; self-report only	Not applicable	None	None	Self-reported outcomes; no clinical verification	Descriptive; χ²; t-tests; correlations
Alghamdi22	Clear; male students 6–13	School setting, timeframe clear	VA + Mohindra + BV tests; no cycloplegia	Defined RE/BV thresholds	None	None	Valid tools, trained examiners	Descriptive + correlations
AlHarkan23	Unclear and included PHC staffers	PHCs; cities described	Expert-developed; piloted; α=0.776	KAP constructs	Age, gender, role	Non-parametric only	Good reliability	MWU, KW, χ²
AlJarallah23	parents of ≤18-yr children	Riyadh region; random online sampling via social media	Questionnaire developed by authors; pilot implied but no α reported	Awareness/knowledge items defined	Gender, education, family history, child lazy eye	χ² + Fisher only; no adjustment	Acceptable; self-report; no reliability metrics	Descriptive + χ² + Fisher
Al-Lahim24	Adults	General population of Tabuk; online stratified sample	Self-administered questionnaire; face validated; no reliability stats	Awareness domains predefined	Education, job	χ² only; no adjustment	Acceptable; no reliability; convenience online sample	Descriptive + χ²
Almogbel 15	Parents <18; exclusions clear	Multi-region sample	Piloted questionnaire	Not applicable	Education, child disease	χ² only	Good internal validity	Descriptive + χ²
Al-Qesair26	parents of male students; 10 schools	Two areas in Qassim; SHU context described	Self-administered questionnaire; no validation reported	Not applicable (perceptions study)	None identified	None addressed	Self-report only; unclear reliability	Descriptive statistics only
Alrahili27	exclusions stated, inclusions are vague	Multistage school sample	Non-cycloplegic autorefractor	AAPOS RE thresholds	Age, gender	Regression	Acceptable validity	χ² + regression
Alrasheed28,29	parents of school children under 18	Public schools across 5 regions; online distribution	Modified validated questionnaire; face-checked; pilot tested	Awareness/knowledge/perception domains defined	Gender, age, education	Tested associations; no multivariable adjustment	Acceptable; validated tool; online sampling	Descriptive + ANOVA + χ²
Alsaqr29	Saudi parents	National online survey	Structured tool	Not applicable	Demographics	χ² only	Acceptable	Frequencies + χ²
Alshail30	HCW excluded	Single hospital	Expert-validated questionnaire	Awareness domains	Education, age	χ² only	Validated tool	χ² + freq
Al-Tamimi 31	all clinic attendees <15 yrs	Private ophthalmic clinic, Dammam; Mar–Jul 2013	Cycloplegic refraction + full exam	Defined criteria for RE, amblyopia, strabismus	Age, sex collected	Not analytically addressed	High clinical validity (cycloplegia + full exam)	Descriptive + χ²
AlThomali 32	School children 7–18 yrs	School registers; large sample; region defined	Non-cycloplegic refraction; full team of trained examiners	MRSE and cyl-based RE definitions provided	None reported	None	Valid procedures; but no cycloplegia limits accuracy	Descriptive only
Alzahrani 33	Adult companions of children under 18	Single-hospital outpatient clinics; setting/timeframe described	Semi-structured tool; face/content validity; reliability reported (Cronbach’s α varied)	Not applicable (KAP survey)	Gender, relation to child, family eye disease	Mann-Whitney, Kruskal-Wallis, χ²	Structured items; partial reliability; self-report	Descriptive + nonparametric tests
Baashar 34	parents of public-school children	School-based survey; setting described	Investigator-developed questionnaire; pilot tested; no reliability stats	Not applicable (KAP survey)	Age, education, prior exam	None	Structured items; limited validation	Descriptive + ANOVA
Basheikh 35	Parents of children 1–16 attending mall awareness event	Mall-based awareness campaign; Jeddah; sampling described	Semi-structured questionnaire; face/content validity; Cronbach α=0.748	Awareness/knowledge scoring system predefined	Nationality, education, prior knowledge	χ² + Fisher only; no multivariable adjustment	Acceptable; moderate reliability; event-based convenience sample	Descriptive + χ² + Fisher
Bashir36	Adults ≥18 yrs, residents of Al-Baha	Regional online survey; setting/timeframe described	Prevalidated modified questionnaire; reliability not reported	Not applicable (awareness survey)	Age, gender, education, family history	Chi-square subgroup analyses	Structured items; face/content validity only	Descriptive + χ²
Darraj37	Under 18 yrs; incomplete files excluded	Hospital-based pediatric ophthalmology clinic; 1-year period	Full ophthalmic exam + cycloplegic refraction by consultant	Clinical diagnostic criteria for RE, strabismus, KC, infection, etc.	Age, sex tested	χ² only; no multivariable adjustment	High validity for clinical diagnoses; complete exams	Descriptive + χ²
Moafa8	Eye care professionals in public/private hospitals	National online survey; random selection of providers	Validated questionnaire (Murthy et al.); self-administered	Workforce, facilities, service availability defined	Region, facility type	Chi-square only	Acceptable; validated tool; self-report + uneven regional sampling	Descriptive + χ²
Mohammed21	Clinic attendees 3–14	Clinical setting described	Cycloplegic refraction + full exam	SE & strabismus criteria	Factors measured	None	High clinical validity	χ², t-tests
Nawaysir 12	Orphans + matched controls	Orphanages & schools detailed	Full exam + cycloplegia	Clear RE & amblyopia criteria	None	None	High validity	OR, CI
Parrey 38,39	Saudi parents ≥18 yrs in Arar	Interview-based stratified community survey; setting described	Investigator-developed proforma; expert-validated; no reliability stats	Not applicable (KAP survey)	Age, gender, education, history of CED	Chi-square subgroup analyses	Structured items; face/content validation only	Descriptive + χ²
Surrati	Saudi parents ≥18 with child <15; exclusions stated	Regional online sample; timeframe defined	Face-validated questionnaire; pilot tested	Knowledge/attitude/practice constructs	Age, income, nationality, child eye disease	Mann–Whitney + Kruskal-Wallis only	Acceptable internal validity; no α reported	Non-parametric tests
Yasir et al.40	Kindergarten + grade 1–2 schoolchildren in Riyadh	Detailed school-based recruitment; age, sex, setting, period described	Validated, calibrated Spot Screener used with standard procedure	Standard SE formula; myopia/hyperopia/astigmatism cut-offs defined	No confounders identified	No mitigation strategies used	Validated devices (Spot Screener + autorefractor for fails) used; trained staff	Descriptive stats, χ², OR with CI used appropriately

## Sheet: Sheet2
						Ages
	Al Bahhawi et al., 2015	87	395	0	395	6–14
	Aldebasi 2015	191	5176	0	5176	6 to 13
	Alghamdi, 2020	80	417	0	417	6 to 13
	Almogbel et al., 2023	121	470	0	470	18-65
	Alrahili et al., 2017	661	1893	0	1893	3–10
	Al-Tamimi et al., 2015	600	1350	0	1350	1–15
	AlThomali et al., 2022	3745	7356	0	7356	7–18
	Darraj et al., 2023	102	385	0	385	0–18
	Nawaysir et al., 2021	49	106	0	106	6–12
	Nawaysir et al., 2021	16	53	0	53	6–12
	Surrati et al., 2021	168	555	0	555	Less than 15
